# Supplementary material for: Maternal Vitamin A Supplementation and Lung Function in Offspring
Source: Atypon-hosted journal article supplement (doi:10.1056/nejmoa0907441), 2010-05-12
Supplement: nejm_checkley_1784sa1.pdf [file nejm_checkley_1784sa1.pdf]

## Supplementary Appendix

This appendix has been provided by the authors to give readers additional information about their work.

Supplement to: Checkley W, West KP Jr, Wise RA, et al. Maternal vitamin A supplementation and lung function in offspring. *N Engl J Med* 2010;362:1784-94.

**Supplemental Table**

|                                                | <b>Effects of maternal supplement assignment on lung function in offspring</b>                |                       |                                                                                   |                       |
|------------------------------------------------|-----------------------------------------------------------------------------------------------|-----------------------|-----------------------------------------------------------------------------------|-----------------------|
|                                                | <b>Mean difference in FEV<sub>1</sub> (ml) between supplemented arms and placebo (95% CI)</b> |                       | <b>Mean difference in FVC (ml) between supplemented arms and placebo (95% CI)</b> |                       |
|                                                | <b>Vitamin A</b>                                                                              | <b>β-carotene</b>     | <b>Vitamin A</b>                                                                  | <b>β-carotene</b>     |
| <b>Final model</b>                             | <b>46 (6 to 86)</b>                                                                           | <b>14 (-24 to 54)</b> | <b>46 (8 to 84)</b>                                                               | <b>17 (-21 to 55)</b> |
| Variable added to final model:                 |                                                                                               |                       |                                                                                   |                       |
| House quality <sup>1</sup>                     | 46 (6 to 86)                                                                                  | 15 (-25 to 55)        | 46 (8 to 84)                                                                      | 19 (-20 to 57)        |
| Owns land <sup>2</sup>                         | 47 (8 to 87)                                                                                  | 15 (-24 to 55)        | 46 (7 to 84)                                                                      | 17 (-21 to 56)        |
| Owns cattle <sup>1</sup>                       | 45 (5 to 85)                                                                                  | 14 (-26 to 54)        | 47 (8 to 84)                                                                      | 18 (-21 to 56)        |
| Owns goats <sup>1</sup>                        | 45 (5 to 85)                                                                                  | 14 (-26 to 54)        | 45 (7 to 83)                                                                      | 17 (-21 to 56)        |
| Owns radio <sup>1</sup>                        | 46 (6 to 86)                                                                                  | 14 (-26 to 54)        | 45 (8 to 84)                                                                      | 18 (-21 to 56)        |
| Maternal literacy <sup>3</sup>                 | 43 (6 to 80)                                                                                  | 11 (-26 to 48)        | 43 (5 to 80)                                                                      | 10 (-27 to 48)        |
| Paternal occupation <sup>4</sup>               | 47 (9 to 85)                                                                                  | 14 (-24 to 52)        | 45 (7 to 84)                                                                      | 15 (-24 to 53)        |
| History of infant pneumonia <sup>5</sup>       | 46 (5 to 87)                                                                                  | 9 (-32 to 50)         | 48 (9 to 86)                                                                      | 12 (-27 to 50)        |
| Maternal tobacco during pregnancy <sup>6</sup> | 37 (-2 to 77)                                                                                 | 3 (-36 to 42)         | 42 (3 to 80)                                                                      | 9 (-30 to 48)         |

<sup>1</sup> = 1 child was missing SES data; <sup>2</sup> = Low quality houses are those minimally constructed with either bamboo or thatch; <sup>3</sup> = 183 missing data on maternal literacy; <sup>4</sup> = 189 children were missing data on paternal occupation; <sup>5</sup> = 66 children were missing data infant pneumonia; <sup>6</sup> = 123 children were missing data on maternal tobacco during pregnancy.
